# Supplementary material
Source: Springer Nature journal article supplement (https://www.springermedizin.de/resource/supplementary/12961_2006_43_MOESM2_ESM.pdf/9571290)

# PRACTICE GUIDELINES EVALUATION AND ADAPTATION CYCLE

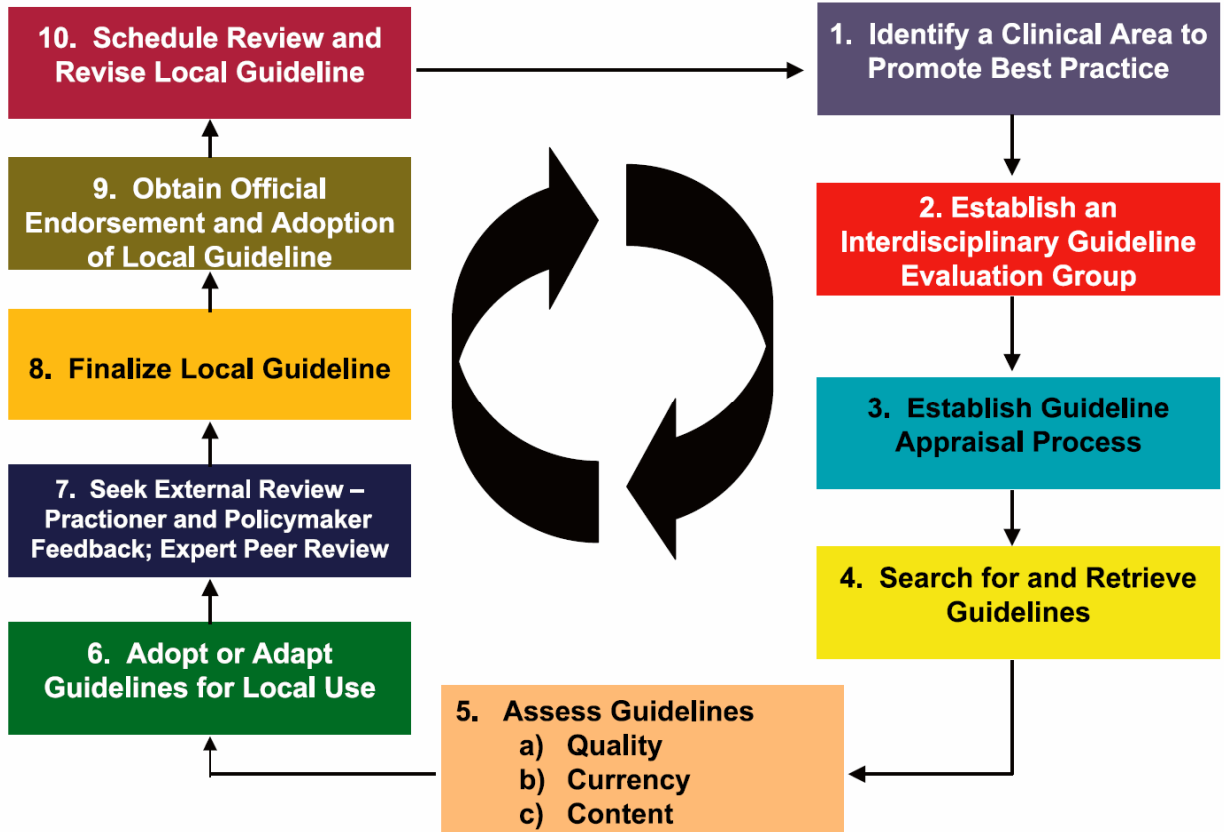

Supplement: MOESM2 [file 9571290]
